# Supplementary material
Source: PubMed Central journal article supplement (PMC6796945)
Supplement: ao9b00783_si_001.pdf [file ao9b00783_si_001.pdf]

## Supporting Information

### Label-Free Telomerase Activity Detection via Electrochemical Impedance Spectroscopy

Diana C. Díaz-Cartagena<sup>a,d</sup>, Griselle Hernández-Cancel<sup>b</sup>, Dina P. Bracho-Rincón<sup>b,c</sup>, José A. González-Feliciano<sup>b</sup>, Lisandro Cunci<sup>d</sup>, Carlos I. González<sup>b,c</sup>, and Carlos R. Cabrera<sup>a,b\*</sup>

<sup>a</sup> Department of Chemistry, University of Puerto Rico, Río Piedras Campus, San Juan, PR 00931

<sup>b</sup> Molecular Sciences Research Center, University of Puerto Rico, San Juan, PR 00926

<sup>c</sup> Department of Biology, University of Puerto Rico, Río Piedras Campus, San Juan, PR 00931

<sup>d</sup> School of Natural Sciences and Technology, Universidad Ana G. Méndez, Gurabo Campus, Gurabo, PR 00778-3030

### Cyclic Voltammetry

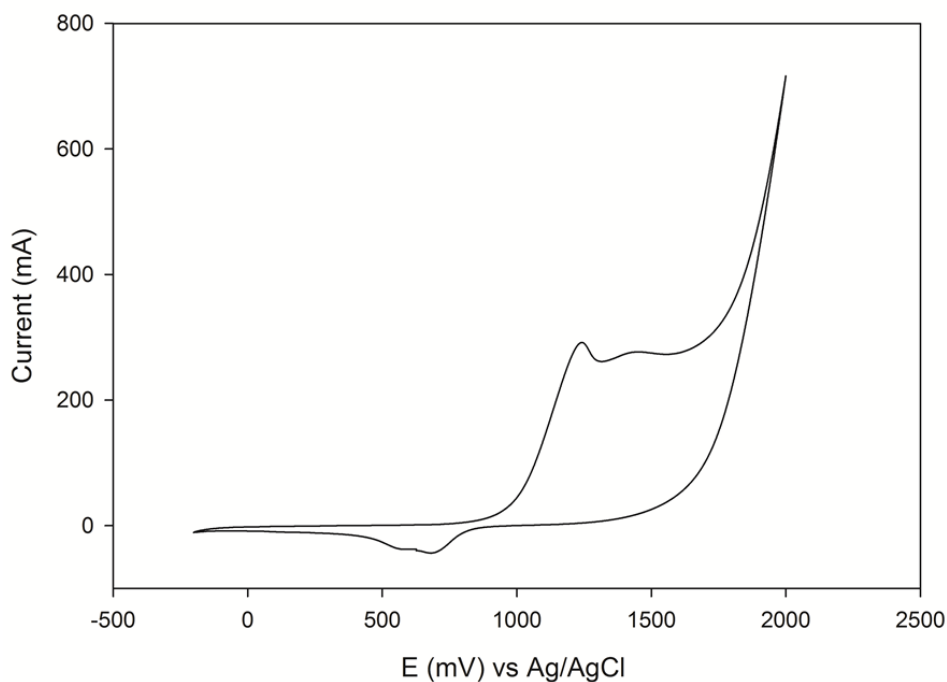

**Figure S1.** Cyclic Voltammogram for TS modified electrode in nuclear extract, dNTPs and Buffer C solution.

## Biosensor Response

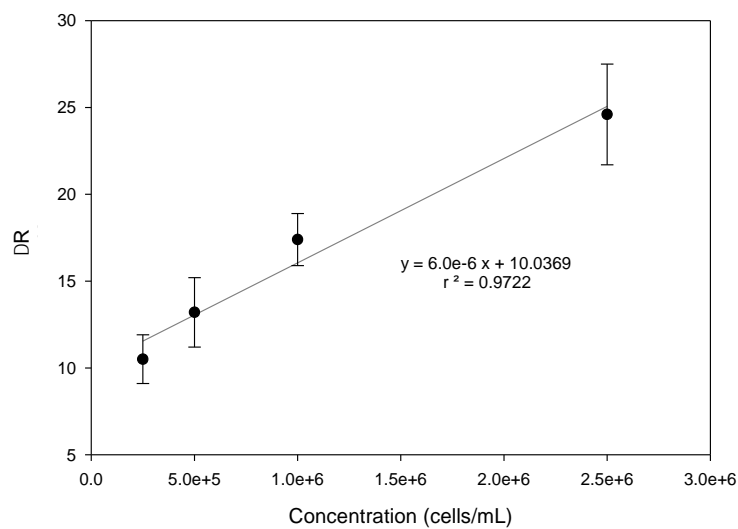

**Figure S2.** Calibration Curve,  $\Delta R$  vs. Concentration, for biosensor response at 180 min of enzymatic reaction.

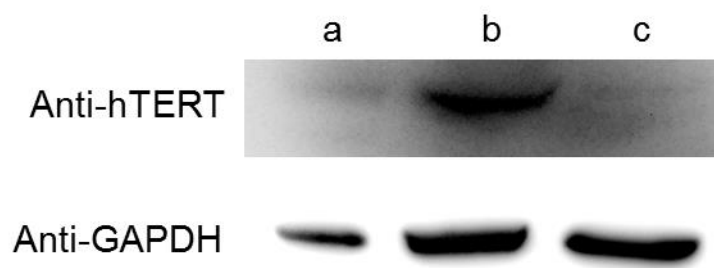

**Figure S3.** Immunoblotting representation targeting telomerase and GAPDH in (a) positive control-Jurkat total extract, (b) nuclear extract sample and (c) cytoplasm fraction.

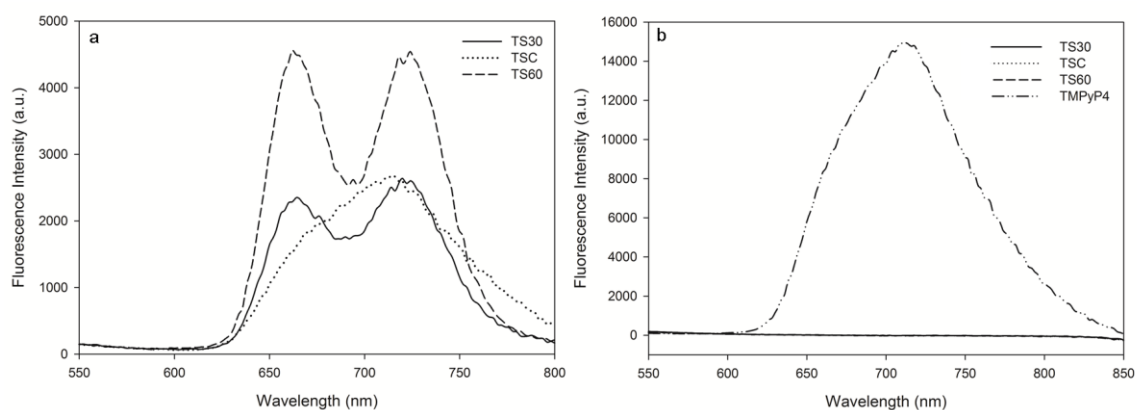

**Figure S4.** (a) Fluorescence spectra for TS probe of 30 bases (**TS30, solid line**), TS complementary probe (**TSC, dot line**) and TS probe of 60 bases (**TS60, dash line**) with TMPyP4. (b) Fluorescence spectra for; TS probe of 30 bases (**TS30, solid line**), TS complementary probe (**TSC, dot line**) and TS probe of 60 bases (**TS60, dash line**) without TMPyP4 and TMPyP4 itself (**dash dot line**).

### Charge Transfer Resistance for 24h and 2h DNA Au Microchip Electrode Modifications

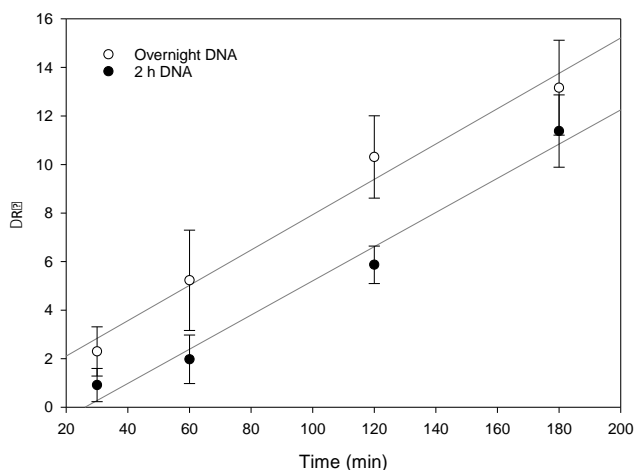

**Figure S5.** Charge transfer resistance changes ( $\Delta R$ ) as a function of telomerase enzymatic reaction time for electrodes modified with TS-30 for (●) 2 hours and (○) 20 h in  $5 \times 10^5$  cells/mL extract with DNTPs. This figure show more change in  $\Delta R$  for overnight modification thus this modification was used for further experiments.
